# Supplementary material for: Acute and chronic phases of complex regional pain syndrome in mice are accompanied by distinct transcriptional changes in the spinal cord
Source: PubMed Central journal article supplement (PMC3751593; doi:10.1186/1744-8069-9-40), 2013-08-08
Supplement: 1744-8069-9-40-S1.pdf [file 1744-8069-9-40-S1.pdf]

| <b>SYMBOL</b>        | <b>DESCRIPTION</b>                                                       | <b>Fold Change</b> |
|----------------------|--------------------------------------------------------------------------|--------------------|
| <b>Scgb3a1</b>       | secretoglobin, family 3A, member 1                                       | 9.21               |
| <b>Sprr1a</b>        | small proline-rich protein 1A                                            | 8.88               |
| <b>Atf3</b>          | activating transcription factor 3                                        | 4.18               |
| <b>Ccl2</b>          | chemokine (C-C motif) ligand 2                                           | 4.17               |
| <b>Ccl7</b>          | chemokine (C-C motif) ligand 7                                           | 4.01               |
| <b>Gal</b>           | galanin                                                                  | 3.86               |
| <b>4933402N22Rik</b> | RIKEN cDNA 4933402N22 gene                                               | 3.69               |
| <b>Pdyn</b>          | prodynorphin                                                             | 3.01               |
| <b>Srsf2</b>         | serine/arginine-rich splicing factor 2                                   | 2.41               |
| <b>Egr4</b>          | early growth response 4                                                  | 2.38               |
| <b>Wdfy1</b>         | WD repeat and FYVE domain containing 1                                   | 2.28               |
| <b>Mustn1</b>        | musculoskeletal, embryonic nuclear protein 1                             | 2.19               |
| <b>Adcyap1</b>       | adenylate cyclase activating polypeptide 1                               | 2.07               |
| <b>Ogfod1</b>        | 2-oxoglutarate and iron-dependent oxygenase domain containing 1          | 2.02               |
| <b>Npy</b>           | neuropeptide Y                                                           | 2.02               |
| <b>F2rl2</b>         | coagulation factor II (thrombin) receptor-like 2                         | 1.97               |
| <b>Cd34</b>          | CD34 antigen                                                             | 1.91               |
| <b>Cbx6</b>          | chromobox homolog 6                                                      | 1.91               |
| <b>Cartpt</b>        | CART prepropeptide                                                       | 1.90               |
| <b>Socs3</b>         | suppressor of cytokine signaling 3                                       | 1.89               |
| <b>Adamts12</b>      | ADAMTS-like 2                                                            | 1.87               |
| <b>Speer5-ps1</b>    | spermatogenesis associated glutamate (E)-rich protein 5, pseudogene 1    | 1.86               |
| <b>Inhba</b>         | inhibin beta-A                                                           | 1.82               |
| <b>Ddx5</b>          | DEAD (Asp-Glu-Ala-Asp) box polypeptide 5                                 | 1.79               |
| <b>Ctla2b</b>        | cytotoxic T lymphocyte-associated protein 2 beta                         | 1.78               |
| <b>Speer4d</b>       | spermatogenesis associated glutamate (E)-rich protein 4d                 | 1.78               |
| <b>Serpinb11</b>     | serine (or cysteine) peptidase inhibitor, clade B (ovalbumin), member 11 | 1.74               |
| <b>6330578E17Rik</b> | RIKEN cDNA 6330578E17 gene                                               | 1.71               |
| <b>Slc12a6</b>       | solute carrier family 12, member 6                                       | 1.71               |
| <b>Dennd4a</b>       | DENN/MADD domain containing 4A                                           | 1.71               |
| <b>Hoxd10</b>        | homeobox D10                                                             | 1.70               |

|                |                                                                                 |      |
|----------------|---------------------------------------------------------------------------------|------|
| <b>Gpr4</b>    | G protein-coupled receptor 4                                                    | 1.70 |
| <b>Cebpd</b>   | CCAAT/enhancer binding protein (C/EBP), delta                                   | 1.70 |
| <b>Cog6</b>    | component of oligomeric golgi complex 6                                         | 1.69 |
| <b>Btg2</b>    | B-cell translocation gene 2, anti-proliferative                                 | 1.68 |
| <b>Arl6ip6</b> | ADP-ribosylation factor-like 6 interacting protein 6                            | 1.68 |
| <b>Ctnn</b>    | cortactin                                                                       | 1.67 |
| <b>Rims1</b>   | regulating synaptic membrane exocytosis 1                                       | 1.66 |
| <b>Spint1</b>  | serine protease inhibitor, Kunitz type 1                                        | 1.66 |
| <b>Tspyl5</b>  | testis-specific protein, Y-encoded-like 5                                       | 1.65 |
| <b>Suv39h2</b> | suppressor of variegation 3-9 homolog 2 (Drosophila)                            | 1.64 |
| <b>Akap12</b>  | A kinase (PRKA) anchor protein (gravin) 12                                      | 1.64 |
| <b>Klf2</b>    | Kruppel-like factor 2 (lung)                                                    | 1.64 |
| <b>Ank3</b>    | ankyrin 3, epithelial                                                           | 1.63 |
| <b>Abhd15</b>  | abhydrolase domain containing 15                                                | 1.63 |
| <b>Eif2s3x</b> | eukaryotic translation initiation factor 2, subunit 3, structural gene X-linked | 1.62 |
| <b>Pde10a</b>  | phosphodiesterase 10A                                                           | 1.61 |
| <b>Hltf</b>    | helicase-like transcription factor                                              | 1.61 |
| <b>Auts2</b>   | autism susceptibility candidate 2                                               | 1.61 |
| <b>Ets1</b>    | E26 avian leukemia oncogene 1, 5' domain                                        | 1.61 |
| <b>Mgp</b>     | matrix Gla protein                                                              | 1.61 |
| <b>Sbno2</b>   | strawberry notch homolog 2 (Drosophila)                                         | 1.59 |
| <b>Rbm17</b>   | RNA binding motif protein 17                                                    | 1.59 |
| <b>Parva</b>   | parvin, alpha                                                                   | 1.59 |
| <b>Pcsk1</b>   | proprotein convertase subtilisin/kexin type 1                                   | 1.59 |
| <b>Rpsa</b>    | ribosomal protein SA                                                            | 1.59 |
| <b>Darc</b>    | Duffy blood group, chemokine receptor                                           | 1.58 |
| <b>Son</b>     | Son DNA binding protein                                                         | 1.57 |
| <b>Tgm2</b>    | transglutaminase 2, C polypeptide                                               | 1.57 |
| <b>Reep2</b>   | receptor accessory protein 2                                                    | 1.57 |
| <b>6-Sep</b>   | septin 6                                                                        | 1.56 |
| <b>Eef2k</b>   | eukaryotic elongation factor-2 kinase                                           | 1.55 |
| <b>Jazf1</b>   | JAZF zinc finger 1                                                              | 1.54 |

|                      |                                                                      |      |
|----------------------|----------------------------------------------------------------------|------|
| <b>Arg1</b>          | arginase, liver                                                      | 1.54 |
| <b>Pknox1</b>        | Pbx/knotted 1 homeobox                                               | 1.54 |
| <b>Meg3</b>          | maternally expressed 3                                               | 1.53 |
| <b>Trank1</b>        | tetratricopeptide repeat and ankyrin repeat containing 1             | 1.53 |
| <b>Atp2a2</b>        | ATPase, Ca <sup>++</sup> transporting, cardiac muscle, slow twitch 2 | 1.53 |
| <b>Dusp2</b>         | dual specificity phosphatase 2                                       | 1.52 |
| <b>Lpcat1</b>        | lysophosphatidylcholine acyltransferase 1                            | 1.52 |
| <b>Slc35a5</b>       | solute carrier family 35, member A5                                  | 1.52 |
| <b>Acta2</b>         | actin, alpha 2, smooth muscle, aorta                                 | 1.52 |
| <b>Ier3</b>          | immediate early response 3                                           | 1.52 |
| <b>Slc30a7</b>       | solute carrier family 30 (zinc transporter), member 7                | 1.51 |
| <b>Psd</b>           | pleckstrin and Sec7 domain containing                                | 1.51 |
| <b>Ptpn</b>          | protein tyrosine phosphatase, receptor type, N                       | 1.51 |
| <b>8430419L09Rik</b> | RIKEN cDNA 8430419L09 gene                                           | 1.51 |
| <b>Lhfp</b>          | lipoma HMGIC fusion partner                                          | 1.51 |
| <b>Fzd2</b>          | frizzled homolog 2 (Drosophila)                                      | 1.51 |
| <b>C030046I01Rik</b> | RIKEN cDNA C030046I01 gene                                           | 1.51 |
| <b>2010005H15Rik</b> | RIKEN cDNA 2010005H15 gene                                           | 1.51 |
| <b>Fosl1</b>         | fos-like antigen 1                                                   | 1.50 |
| <b>1700001O22Rik</b> | RIKEN cDNA 1700001O22 gene                                           | 1.50 |
| <b>Jak3</b>          | Janus kinase 3                                                       | 1.50 |
| <b>Gprc5b</b>        | G protein-coupled receptor, family C, group 5, member B              | 0.13 |
| <b>Loxl2</b>         | lysyl oxidase-like 2                                                 | 0.29 |
| <b>Slc36a2</b>       | solute carrier family 36 (proton/amino acid symporter), member 2     | 0.40 |
| <b>Ly6d</b>          | lymphocyte antigen 6 complex, locus D                                | 0.43 |
| <b>Mapk8</b>         | mitogen-activated protein kinase 8                                   | 0.45 |
| <b>Ccl5</b>          | chemokine (C-C motif) ligand 5                                       | 0.46 |
| <b>Zswim6</b>        | zinc finger, SWIM domain containing 6                                | 0.46 |
| <b>Cadm3</b>         | cell adhesion molecule 3                                             | 0.48 |
| <b>1700030C10Rik</b> | RIKEN cDNA 1700030C10 gene                                           | 0.48 |
| <b>Clec7a</b>        | C-type lectin domain family 7, member a                              | 0.48 |

|                  |                                                                   |      |
|------------------|-------------------------------------------------------------------|------|
| <b>Islr</b>      | immunoglobulin superfamily containing leucine-rich repeat         | 0.51 |
| <b>Alox12</b>    | arachidonate 12-lipoxygenase                                      | 0.52 |
| <b>Slc34a3</b>   | solute carrier family 34 (sodium phosphate), member 3             | 0.53 |
| <b>Serpind1</b>  | serine (or cysteine) peptidase inhibitor, clade D, member 1       | 0.53 |
| <b>Prss23</b>    | protease, serine, 23                                              | 0.55 |
| <b>Nkain1</b>    | Na <sup>+</sup> /K <sup>+</sup> transporting ATPase interacting 1 | 0.55 |
| <b>Cadm2</b>     | cell adhesion molecule 2                                          | 0.55 |
| <b>Spn</b>       | sialophorin                                                       | 0.55 |
| <b>Rhd</b>       | Rh blood group, D antigen                                         | 0.55 |
| <b>Myoc</b>      | myocilin                                                          | 0.56 |
| <b>Nostrin</b>   | nitric oxide synthase trafficker                                  | 0.56 |
| <b>Ide</b>       | insulin degrading enzyme                                          | 0.56 |
| <b>Akap2</b>     | A kinase (PRKA) anchor protein 2                                  | 0.56 |
| <b>Hist1h2ak</b> | histone cluster 1, H2ak                                           | 0.57 |
| <b>Ccr11</b>     | chemokine (C-C motif) receptor-like 1                             | 0.57 |
| <b>Tnfaip2</b>   | tumor necrosis factor, alpha-induced protein 2                    | 0.58 |
| <b>Loxl1</b>     | lysyl oxidase-like 1                                              | 0.58 |
| <b>Lmnb1</b>     | lamin B1                                                          | 0.58 |
| <b>Ramp1</b>     | receptor (calcitonin) activity modifying protein 1                | 0.58 |
| <b>Myh8</b>      | myosin, heavy polypeptide 8, skeletal muscle, perinatal           | 0.59 |
| <b>Fzd10</b>     | frizzled homolog 10 (Drosophila)                                  | 0.59 |
| <b>Exoc6b</b>    | exocyst complex component 6B                                      | 0.59 |
| <b>Plp</b>       | plasma membrane proteolipid                                       | 0.60 |
| <b>Gab3</b>      | growth factor receptor bound protein 2-associated protein 3       | 0.60 |
| <b>Expi</b>      | extracellular proteinase inhibitor                                | 0.60 |
| <b>Hdc</b>       | histidine decarboxylase                                           | 0.60 |
| <b>Nhedc2</b>    | Na <sup>+</sup> /H <sup>+</sup> exchanger domain containing 2     | 0.60 |
| <b>Igfbp4</b>    | insulin-like growth factor binding protein 4                      | 0.61 |
| <b>Cenpe</b>     | centromere protein E                                              | 0.61 |
| <b>Ptger3</b>    | prostaglandin E receptor 3 (subtype EP3)                          | 0.61 |
| <b>P2ry12</b>    | purinergic receptor P2Y, G-protein coupled 12                     | 0.62 |
| <b>Txlnb</b>     | taxilin beta                                                      | 0.62 |

|                      |                                                                                               |      |
|----------------------|-----------------------------------------------------------------------------------------------|------|
| <b>Ltb</b>           | lymphotoxin B                                                                                 | 0.62 |
| <b>Prom1</b>         | prominin 1                                                                                    | 0.62 |
| <b>Adamts2</b>       | a disintegrin-like and metallopeptidase (reprolysin type) with thrombospondin type 1 motif, 2 | 0.62 |
| <b>Nufip2</b>        | nuclear fragile X mental retardation protein interacting protein 2                            | 0.62 |
| <b>Cnksr3</b>        | Cnksr family member 3                                                                         | 0.63 |
| <b>Sdad1</b>         | SDA1 domain containing 1                                                                      | 0.63 |
| <b>Pygl</b>          | liver glycogen phosphorylase                                                                  | 0.63 |
| <b>2210012G02Rik</b> | RIKEN cDNA 2210012G02 gene                                                                    | 0.64 |
| <b>Pcdh12</b>        | protocadherin 12                                                                              | 0.64 |
| <b>Ugt8a</b>         | UDP galactosyltransferase 8A                                                                  | 0.64 |
| <b>Tprkb</b>         | Tp53rk binding protein                                                                        | 0.65 |
| <b>Cmya5</b>         | cardiomyopathy associated 5                                                                   | 0.65 |
| <b>Enpp1</b>         | ectonucleotide pyrophosphatase/phosphodiesterase 1                                            | 0.65 |
| <b>Rnf13</b>         | ring finger protein 13                                                                        | 0.65 |
| <b>Icam4</b>         | intercellular adhesion molecule 4, Landsteiner-Wiener blood group                             | 0.65 |
| <b>Pgm5</b>          | phosphoglucomutase 5                                                                          | 0.65 |
| <b>Nckap5</b>        | NCK-associated protein 5                                                                      | 0.65 |
| <b>Agtr2</b>         | angiotensin II receptor, type 2                                                               | 0.65 |
| <b>Itgal</b>         | integrin alpha L                                                                              | 0.65 |
| <b>Bace2</b>         | beta-site APP-cleaving enzyme 2                                                               | 0.65 |
| <b>Hmcn1</b>         | hemicentin 1                                                                                  | 0.65 |
| <b>S100a6</b>        | S100 calcium binding protein A6 (calcyclin)                                                   | 0.65 |
| <b>Fam98b</b>        | family with sequence similarity 98, member B                                                  | 0.65 |
| <b>Slc26a10</b>      | solute carrier family 26, member 10                                                           | 0.65 |
| <b>Sned1</b>         | sushi, nidogen and EGF-like domains 1                                                         | 0.66 |
| <b>Tecrl</b>         | trans-2,3-enoyl-CoA reductase-like                                                            | 0.66 |
| <b>Ssr1</b>          | signal sequence receptor, alpha                                                               | 0.66 |
| <b>Lrba</b>          | LPS-responsive beige-like anchor                                                              | 0.66 |
| <b>Hhip</b>          | Hedgehog-interacting protein                                                                  | 0.66 |
| <b>1700009P17Rik</b> | RIKEN cDNA 1700009P17 gene                                                                    | 0.66 |
| <b>A530054K11Rik</b> | RIKEN cDNA A530054K11 gene                                                                    | 0.66 |

|              |                           |      |
|--------------|---------------------------|------|
| <b>Pgam2</b> | phosphoglycerate mutase 2 | 0.66 |
| <b>Aspa</b>  | aspartoacylase            | 0.66 |
