# Supplementary material for: Acute and chronic phases of complex regional pain syndrome in mice are accompanied by distinct transcriptional changes in the spinal cord
Source: PubMed Central journal article supplement (PMC3751593; doi:10.1186/1744-8069-9-40), 2013-08-08
Supplement: 1744-8069-9-40-S3.pdf [file 1744-8069-9-40-S3.pdf]

| Category                                       | p-value           | Molecules                                                                                                                                                                                                                                                                                                                                                                                                                                                                                                                       |
|------------------------------------------------|-------------------|---------------------------------------------------------------------------------------------------------------------------------------------------------------------------------------------------------------------------------------------------------------------------------------------------------------------------------------------------------------------------------------------------------------------------------------------------------------------------------------------------------------------------------|
| Cellular Movement                              | 2.33E-07-7.39E-03 | LY6D,SOC3,IGFBP4,SPN,PTGER3,LTB,ALOX12,CCL5,LMNB1,HOXD10,SERPIND1,TGM2,CCL13,MGP,CCR1,FOSL1,KLF2,DARC,SLC12A6,NPY,ETS1,PARVA,ATF3,CARTPT,SCGB3A1,HDC,MAPK8,RAMP1,ITGAL,INHBA,CLEC7A,MYOC,CCL7,CEBPD,BTG2,ADCYAP1,JAK3,CTTN,CD34,AGTR2,RPSA,ARG1                                                                                                                                                                                                                                                                                 |
|                                                | 6.34E-06-9.03E-03 | RAC2,Ly6a,RARRES2,F2R,TP73,PYCARD,HRG,CELF3,TGFB1,CD274,OSMR,Ccl6,ETS1,VWF,MAN2A1,C5,ARHGDI, SERPINE2,Cc9,CSF2RB,ITGB2,CYLD,CYR61,ESR1,PPP1R9A,WNT11                                                                                                                                                                                                                                                                                                                                                                            |
| Cancer                                         | 3.5E-07-8.19E-03  | SRSF2,SOC3,CADM3,DENN4,KIAA1467,SLC36A2,LTB,ATP2A2,ADAMTS2,HOXD10,SDAD1,DDX5,GAL,GPR4,MGP,TNFAIP2,FOSL1,PCDH12,TXNLB,KLF2,ETS1,LRBA,SON,ATF3,SLC9B2,PDE10A,EGFR4,TSPYL5,IER3,HHIP,PLP,INHBA,ISLR,PCSK1,HMCN1,PRSS23,CEBPD,LOXL1,BTG2,PGM5,RIMS1,RHCE,RHD,ADCYAP1,CD34,CTTN,AGTR2,LY6D,AKAP12,ANK3,IGFBP4,ZNF208,ZNF279,S100A6,F2R12,PKNOX1,SPN,PTGER3,MYH8,ALOX12,CCL5,PROM1,LOXL2,DUSP2,SERPIND1,TGM2,GPRCSB,CCL13,CCR11,EEF2K,NUFIP2,SLC12A6,RBM17,PARVA,ENPP1,HDC,MAPK8,UGT8,RAMP1,ITGAL,ASPA,MYOC,CCL7,PSD,LPCAT1,JAK3,HLTF |
|                                                | 4.08E-04-9.13E-03 | RAC2,RARRES2,F2R,TP73,PYCARD,HRG,NPNT,CD52,SRP54,IFITM2,IKZF2,TGFB1,CYBA,CD274,OSMR,ETS1,VWF,C5,OGG1,SERPINE2,ITGB2,CSF2RB,F9,CSCT7,CYLD,CYR61,ESR1,WNT11                                                                                                                                                                                                                                                                                                                                                                       |
| Cardiovascular System Development and Function | 1.56E-06-7.39E-03 | 3,CARTPT,MAPK8,RAMP1,IER3,Meg3,NOSTRIN,INHBA,SPINT1,PCSK1,CCL7,CTTN,CD34,AGTR2,ARG1                                                                                                                                                                                                                                                                                                                                                                                                                                             |
|                                                | 1.52E-04-7.32E-03 | ETS1,RAC2,F2R,TP73,ZFP36L1,VWF,C5,HRG,CSF2RB,ITGB2,TGFB1,CYBA,LYL1,F9,CD274,CYLD,CYR61,ESR1,WNT11,LUZP1                                                                                                                                                                                                                                                                                                                                                                                                                         |
| Organismal Development                         | 1.56E-06-7.25E-03 | AKAP12,IGFBP4,SOC3,PTGER3,LTB,ALOX12,CCL5,ATP2A2,LMNB1,HOXD10,ADAMTS2,SERPIND1,TGM2,SLC30A7,CCL13,GAL,MGP,FOSL1,KLF2,DARCE,TS1,NPY,ENPP1,ATF3,CARTPT,HDC,MAPK8,HHIP,Meg3,INHBA,NOSTRIN,SPINT1,SLC34A3,PCSK1,CCL7,CEBPD,LOXL1,RIMS1,ADCYAP1,JAK3,CD34,AGTR2,ARG1                                                                                                                                                                                                                                                                 |
|                                                | 1.52E-04-5.95E-03 | ETS1,RAC2,TCF15,HHIT1H1E,F2R,ZFP36L1,C5,MAN2A1,HRG,CSF2RB,ITGB2,TGFB1,CYBA,CYLD,MAN2A2,CYR61,ESR1,WNT11,LUZP1                                                                                                                                                                                                                                                                                                                                                                                                                   |
| Nutritional Disease                            | 4.94E-06-7.39E-03 | NPY,SOC3,ENPP1,ATF3,PTGER3,CARTPT,HDC,MAPK8,LTB,CCL5,INHBA,TGM2,SLC34A3,PCSK1,CCL13,SLC30A7,GAL,ADCYAP1,AGTR2                                                                                                                                                                                                                                                                                                                                                                                                                   |
|                                                | 1.81E-03-5.28E-03 | TGFB1,TP73,CD274,ESR1                                                                                                                                                                                                                                                                                                                                                                                                                                                                                                           |
| Cell Death and Survival                        | 1.1E-05-7.96E-03  | CSTA,SRSF2,SOC3,DENN4A,LTB,OGFOD1,IDE,LMNB1,ATP2A2,DDX5,GAL,MGP,FOSL1,FZD2,KLF2,NPY,ETS1,SON,ATF3,PDYN,SCGB3A1,EGFR4,IER3,INHBA,CEBPD,BTG2,ADCYAP1,CTTN,AGTR2,RPSA,ARG1,AKAP12,IGFBP4,S100A6,SPN,PTGER3,ALOX12,CCL5,LOXL2,DUSP2,TGM2,CCL13,EEF2K,RBM17,PARVA,MAPK8,UGT8,ITGAL,Meg3,SPINT1,Spr1a,CCL7,JAK3                                                                                                                                                                                                                       |
|                                                | 1.06E-04-8.26E-03 | CREBL2,RAC2,Ly6a,F2R,TCF15,PYCARD,TP73,VPRBP,ZFP36L1,HRG,NPNT,MADD,IKZF2,TGFB1,CYBA,LYL1,Gsta3,CD274,SNCB,Ccl6,ATN1,ETS1,PTPRCAP,ELP1,FAM134B,MT3,C5,MAN2A1,OGG1,Cc9,SERPINE2,ITGB2,CSF2RB,SREBF2,CYLD,CYR61,ESR1,WNT11,PPP1R9A                                                                                                                                                                                                                                                                                                 |
| Nucleic Acid Metabolism                        | 1.26E-05-7.96E-03 | AKAP12,NPY,SOC3,ENPP1,PTGER3,PDE10A,RAMP1,CCL5,IDE,ATP2A2,INHBA,MYOC,GPR4,GAL,P2RY12,ADCYAP1,HLTF,AGTR2                                                                                                                                                                                                                                                                                                                                                                                                                         |
|                                                | 2.07E-03-2.07E-03 | RAC2,ARHGDI                                                                                                                                                                                                                                                                                                                                                                                                                                                                                                                     |
| Small Molecule Biochemistry                    | 1.26E-05-7.96E-03 | AKAP12,IGFBP4,SOC3,PTGER3,ALOX12,IDE,CCL5,ATP2A2,TGM2,CCL13,GPR4,GAL,FOSL1,PTPRN,NPY,JAZF1,ENPP1,PDE10A,CARTPT,PDYN,HDC,MAPK8,PGAM2,UGT8,PYGL,RAMP1,ITGAL,INHBA,ASPA,SLC34A3,CLEC7A,MYOC,PCSK1,LPCAT1,CEBPD,P2RY12,ADCYAP1,CD34,HLTF,AGTR2,RPSA,ARG1                                                                                                                                                                                                                                                                            |
|                                                | 1.1E-04-5.95E-03  | ETS1,CSF2RB,RAC2,RARRES2,F2R,TGFB1,CYBA,MAN2A1,C5,CHIA,ESR1,ARHGDI                                                                                                                                                                                                                                                                                                                                                                                                                                                              |
| Cell-To-Cell Signaling and Interaction         | 1.6E-05-7.39E-03  | TPT,PDYN,HDC,MAPK8,RAMP1,ITGAL,INHBA,CLEC7A,MYOC,PCSK1,CCL7,P2RY12,SBNO2,JAK3,RHCE/RHD,ADCYAP1,CTTN,CD34,AGTR2,RPSA                                                                                                                                                                                                                                                                                                                                                                                                             |
|                                                | 1.87E-06-9.01E-03 | others),RARRES2,F2R,PYCARD,TP73,RAPGEF6,MEPE,HRG,CD52,TGFB1,CD274,Ccl6,ETS1,VWF,C5,MAN2A1,SERPINE2,Cc9,CSF2RB,ITGB2,F9,CYLD,CYR61,                                                                                                                                                                                                                                                                                                                                                                                              |
| Molecular Transport                            | 1.6E-05-7.96E-03  | ANK3,IGFBP4,S100A6,PTGER3,SLC36A2,CCL5,ATP2A2,TGM2,SLC30A7,CCL13,GAL,KLF2,PTPRN,DARC,SLC12A6,NPY,PDE10A,PDYN,CARTPT,HDC,MAPK8,PGAM2,UGT8,RAMP1,CNKSRR3,PLLP,ITGAL,INHBA,SLC34A3,CLEC7A,MYOC,PCSK1,CCL7,CEBPD,P2RY12,ADCYAP1,AGTR2,ARG1                                                                                                                                                                                                                                                                                          |
|                                                | 1.1E-04-5.95E-03  | CSF2RB,RAC2,ITGB2,Ly6a (includes others),RARRES2,F2R,TGFB1,C5,Ccl6,ESR1,Cc9                                                                                                                                                                                                                                                                                                                                                                                                                                                     |
| Hematological System Development and Function  | 1.99E-05-7.91E-03 | SOC3,F2R12,PKNOX1,SPN,PTGER3,LTB,ALOX12,CCL5,ATP2A2,SERPIND1,TGM2,CCL13,GAL,FOSL1,CCR11,KLF2,PTPRN,DARC,ETS1,NPY,ATF3,CARTPT,HDC,MAPK8,IER3,RAMP1,GAB3,ITGAL,INHBA,CLEC7A,PCSK1,CCL7,CEBPD,BTG2,P2RY12,SBNO2,RHCE/RHD,ADCYAP1,JAK3,CTTN,CD34,AGTR2,ARG1                                                                                                                                                                                                                                                                         |
|                                                | 3.77E-06-9.03E-03 | RAC2,Ly6a,RARRES2,F2R,PYCARD,ZFP36L1,RAPGEF6,HRG,GRAP,CD52,IKZF2,TGFB1,LYL1,IFI30,CD274,Ccl6,BST1,ETS1,PTPRCAP,VWF,MAN2A1,C5,ARHGDI, SERPINE2,Cc9,CSF2RB,ITGB2,F9,CYLD,CYR61,ESR1                                                                                                                                                                                                                                                                                                                                               |
| Immune Cell Trafficking                        | 1.99E-05-7.27E-03 | SOC3,SPN,PTGER3,LTB,ALOX12,CCL5,TGM2,CCL13,FOSL1,KLF2,DARC,NPY,ETS1,ATF3,HDC,MAPK8,IER3,ITGAL,INHBA,CLEC7A,CCL7,SBNO2,JAK3,ADCYAP1,CD34,CTTN,ARG1                                                                                                                                                                                                                                                                                                                                                                               |
|                                                | 6.34E-06-9.03E-03 | ETS1,RAC2,RARRES2,Ly6a (includes others),F2R,PYCARD,RAPGEF6,VWF,C5,HRG,Cc9,CSF2RB,ITGB2,TGFB1,CD274,ESR1,Ccl6                                                                                                                                                                                                                                                                                                                                                                                                                   |
| Inflammatory Response                          | 2.16E-05-7.93E-03 | ,INHBA,CLEC7A,PCSK1,CCL7,SBNO2,ADCYAP1,JAK3,CD34,CTTN,AGTR2,ARG1                                                                                                                                                                                                                                                                                                                                                                                                                                                                |
|                                                | 1.87E-06-9.03E-03 | RAC2,Ly6a,RARRES2,F2R,PYCARD,TP73,HRG,TGFB1,CYBA,LYL1,CD274,Ccl6,ETS1,VWF,C5,MAN2A1,OGG1,Cc9,SERPINE2,ITGB2,CSF2RB,RETNLB,SREBF2,F9,CYLD,ESR1,CHIA                                                                                                                                                                                                                                                                                                                                                                              |
| Tissue Development                             | 2.69E-05-7.39E-03 | AKAP12,SOC3,CADM3,F2R12,SPN,PTGER3,LTB,ALOX12,CCL5,ATP2A2,LMNB1,ADAMTS2,HOXD10,SERPIND1,TGM2,CCL13,MGP,FOSL1,PCDH12,FZD2,KLF2,DARC,SLC12A6,ETS1,NPY,PARVA,ENPP1,CARTPT,HDC,MAPK8,IER3,Meg3,ITGAL,INHBA,SLC34A3,CLEC7A,MYOC,CCL7,LOXL1,P2RY12,RIMS1,ADCYAP1,RHCE/RHD,JAK3,CD34,CTTN,AGTR2,RPSA,ARG1                                                                                                                                                                                                                              |
|                                                | 1.28E-04-8.26E-03 | ETS1,RAC2,CADM3,Ly6a,F2R,RAPGEF6,VWF,MAN2A1,C5,SERPINE2,ITGB2,CSF2RB,TGFB1,CD274,MAN2A2,CYLD,CYR61,ESR1,WNT11,LUZP1                                                                                                                                                                                                                                                                                                                                                                                                             |
| Cellular Function and Maintenance              | 2.96E-05-7.25E-03 | ANK3,AKAP12,FZD10,SOC3,IGFBP4,F2R12,PKNOX1,SPN,LTB,CCL5,ATP2A2,DUSP2,TGM2,CCL13,GAL,CENPE,CCR11,EEF2K,KLF2,DARC,NPY,ETS1,PARVA,ATF3,ENPP1,CARTPT,HDC,MAPK8,UGT8,PYGL,ITGAL,INHBA,SLC34A3,AKAP2,PALM2,AKAP2,CLEC7A,PCSK1,PSD,CCL7,BTG2,P2RY12,RHCE/RHD,ADCYAP1,JAK3,CTTN,AGTR2                                                                                                                                                                                                                                                   |
|                                                | 2.41E-05-9.01E-03 | RAC2,Ly6a,F2R,PYCARD,HRG,TGFB1,LYL1,IFI30,CD274,MSTO1,BST1,ETS1,PTPRCAP,SEC23IP,VWF,MT3,C5,MAN2A1,KIF3B,ARHGDI,CSF2RB,ITGB2,DSCAM,CYLD,CYR61,ESR1,PPP1R9A                                                                                                                                                                                                                                                                                                                                                                       |
| Cell-mediated Immune Response                  | 5.21E-05-7.25E-03 | ETS1,SOC3,PKNOX1,SPN,HDC,MAPK8,LTB,CCL5,ITGAL,INHBA,TGM2,PCSK1,CCL13,CCL7,JAK3,ADCYAP1,KLF2,DARC                                                                                                                                                                                                                                                                                                                                                                                                                                |
|                                                | 2.67E-04-7.06E-03 | ETS1,ITGB2,CD52,Ly6a (includes others),TGFB1,CD274,CYLD                                                                                                                                                                                                                                                                                                                                                                                                                                                                         |
| Cellular Development                           | 5.21E-05-7.39E-03 | CSTA,SRSF2,IGFBP4,SOC3,PKNOX1,SPN,LTB,ALOX12,CCL5,ATP2A2,SERPIND1,TGM2,DDX5,CCL13,GAL,MGP,CCR11,FOSL1,FZD2,KLF2,PTPRN,SLC12A6,ETS1,NPY,ENPP1,ATF3,CARTPT,MAPK8,PGAM2,UGT8,GAB3,ITGAL,INHBA,ASPA,PCSK1,CEBPD,BTG2,P2RY12,JAK3,ADCYAP1,CD34,AGTR2,ARG1                                                                                                                                                                                                                                                                            |
|                                                | 1.28E-04-8.44E-03 | RAC2,Ly6a,RARRES2,F2R,ELAVL3,PYCARD,TP73,LRG1,ZFP36L1,NPNT,GRAP,IKZF2,TGFB1,LYL1,OSMR,CD274,ATN1,ETS1,PTPRCAP,PELP1,VWF,DKKL1,C5,ARHGDI,Cc9,SERPINE2,CSF2RB,ITGB2,CYLD,CYR61,ESR1,WNT11                                                                                                                                                                                                                                                                                                                                         |
| Lipid Metabolism                               | 5.21E-05-7.25E-03 | NPY,SOC3,IGFBP4,JAZF1,CARTPT,HDC,MAPK8,UGT8,ALOX12,CCL5,ITGAL,INHBA,ASPA,CLEC7A,CCL13,GAL,LPCAT1,CEBPD,ADCYAP1,AGTR2                                                                                                                                                                                                                                                                                                                                                                                                            |
|                                                | 1.1E-04-5.95E-03  | CSF2RB,RARRES2,F2R,TGFB1,C5,ESR1                                                                                                                                                                                                                                                                                                                                                                                                                                                                                                |
| Cell Morphology                                | 5.88E-05-7.39E-03 | K3,ADCYAP1,CTTN,AGTR2,ARG1                                                                                                                                                                                                                                                                                                                                                                                                                                                                                                      |
|                                                | 2.83E-04-5.95E-03 | ETS1,RAC2,Ly6a,F2R,TP73,SEC23IP,VWF,MT3,MAN2A1,C5,KIF3B,SERPINE2,ITGB2,TGFB1,CD274,OSMR,DSCAM,MAN2A2,CYLD,ESR1,WNT11,PPP1R9A                                                                                                                                                                                                                                                                                                                                                                                                    |
| Hypersensitivity Response                      | 5.88E-05-7.25E-03 | ATF3,CCL13,CCL7,HDC,CCL5,JAK3                                                                                                                                                                                                                                                                                                                                                                                                                                                                                                   |
|                                                | 2.04E-04-3.57E-03 | RAC2,ITGB2,F2R,TGFB1,C5                                                                                                                                                                                                                                                                                                                                                                                                                                                                                                         |
